# Supplementary material
Source: HighWire-hosted journal article supplement (https://bmjopensem.bmj.com/content/5/1/e000532)

**SUPPLEMENRAY MATERIAL 1: Running Leg Pain Profile**

The Running Leg Pain Profile (RLPP) is the pain scoring system used to diagnose military patients with ERLP. Patients are asked every minute, to give a pain score of 0-10 for four (or six, when including the calves) regions of the legs. The RLPP assists in pinpointing an accurate diagnosis and also provides information on the severity of symptoms: MTSS is suspected when pain is reported in regions 2 and 3, and anterior-CECS is suspected with pain in regions 1 and 4. Combined symptoms may indicate concurrence of the two diagnoses. The RLPP is performed with a standardized treadmill protocol (see Supplementary material 2). This 14-minute protocol comprises running and marching and is designed to reproduce symptoms to the limit of tolerable pain in the military patient group. The test is performed in running shoes, shorts and a t-shirt.


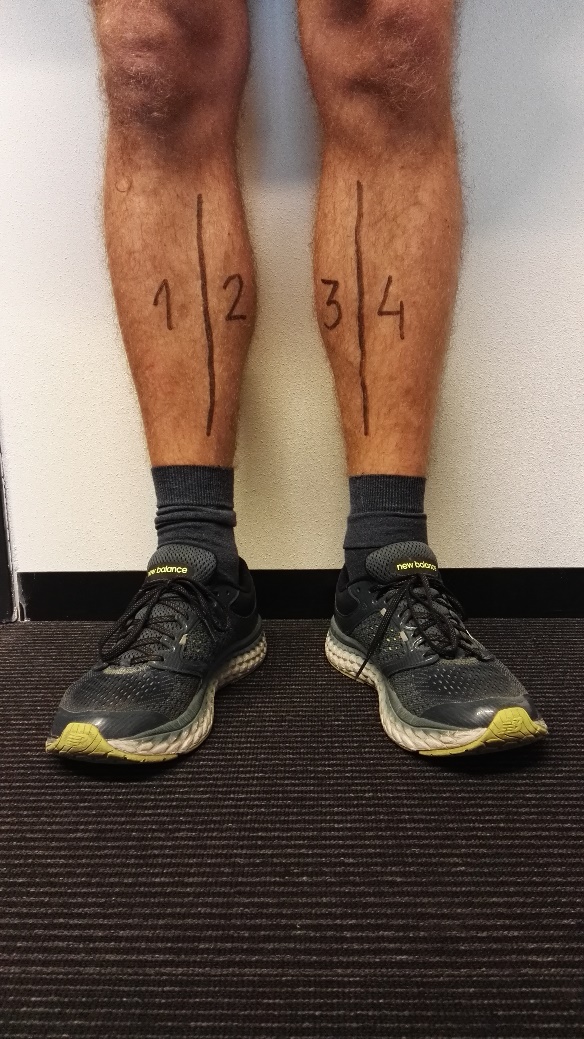

Supplement: inline-supplementary-material-2 [file inline-supplementary-material-2.docx]
