# Supplementary material
Source: HighWire-hosted journal article supplement (https://bmjopensem.bmj.com/content/5/1/e000532)
Supplement: inline-supplementary-material-3 [file inline-supplementary-material-3.docx]

| **velocity** | **slope** | **time** | **anterior** | **medial** | **medial** | **anterior** | **calve** | **calve** |
| --- | --- | --- | --- | --- | --- | --- | --- | --- |
| **km/h** | **%** |  | **compartm.** | **tibial border** | **tibial border** | **compartm.** | **right** | **left** |
|  |  |  | **right** | **right** | **left** | **left** | **(optional)** | **(optional)** |
| 5 | 1 | 0'55'' |  |  |  |  |  |  |
| 6 | 1 | 1'55'' |  |  |  |  |  |  |
| 7 | 1 | 2'55'' |  |  |  |  |  |  |
| 8 | 1 | 3'55'' |  |  |  |  |  |  |
| 9 | 1 | 4'55'' |  |  |  |  |  |  |
| 10 | 1 | 5'55'' |  |  |  |  |  |  |
| 11 | 1 | 6'55'' |  |  |  |  |  |  |
| 12 | 1 | 7'55'' |  |  |  |  |  |  |
| 12 | 5 | 8'55'' |  |  |  |  |  |  |
| 12 | 5 | 9'55'' |  |  |  |  |  |  |
| 7,5 | 5 | 10'55'' |  |  |  |  |  |  |
| 7,5 | 5 | 11'55'' |  |  |  |  |  |  |
| 12 | 1 | 12'55'' |  |  |  |  |  |  |
| 12 | 1 | 13'55'' |  |  |  |  |  |  |
| finish | time: |  |  |  |  |  |  |  |

**SUPPLEMENTARY MATERIAL 2.**

1. Treadmill protocol and template to record the Running Leg Pain Profile (RLPP) scores (0-10) in this study.
